# Supplementary material for: OMI tropospheric NO 2 air mass factors over South America: effects of biomass burning aerosols
Source: Copernicus journal article supplement (doi:10.5194/amt-8-3831-2015), 2015-09-18
Supplement: Supplementary file 1 [file amt-8-3831-2015-supplement.pdf]

Supplement of Atmos. Meas. Tech., 8, 3831–3849, 2015  
<http://www.atmos-meas-tech.net/8/3831/2015/>  
doi:10.5194/amt-8-3831-2015-supplement  
© Author(s) 2015. CC Attribution 3.0 License.

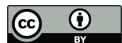

*Supplement of*

## **OMI tropospheric NO<sub>2</sub> air mass factors over South America: effects of biomass burning aerosols**

**P. Castellanos et al.**

*Correspondence to:* P. Castellanos ([patricia.castellanos@nasa.gov](mailto:patricia.castellanos@nasa.gov))

The copyright of individual parts of the supplement might differ from the CC-BY 3.0 licence.

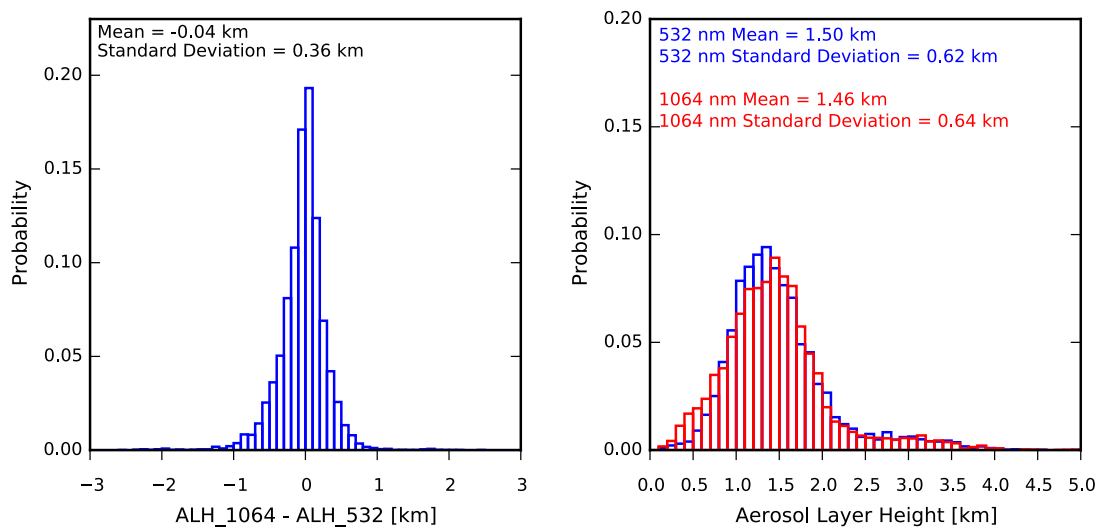

Figure S1. The probability distributions of the of the effective aerosol layer height derived from the 1064 nm and 532 nm CALIOP aerosol extinction vertical profile observations and their difference
